# Supplementary material for: Unraveling the highly selective nature of silver-based metal–organic complexes for the detection of metal ions: the synergistic effect of dicarboxylic acid linkers
Source: Royal Society of Chemistry journal article supplement (doi:10.1039/c9tc07078h), 2020-01-01
Supplement: c9tc07078h1.pdf [file c9tc07078h1.pdf]

## Supporting information

### **Unraveling the highly selective nature of silver-based metal-organic complexes for the detection of metal ions: Synergistic effect of dicarboxylic acid linkers**

Chi Van Nguyen<sup>a,b</sup>, Babasaheb M. Matsagar<sup>c</sup>, Tansir Ahamad,<sup>d</sup> Saad M Alshehri,<sup>d</sup> Wei-Hung Chiang<sup>a,\*</sup> and Kevin C.-W. Wu<sup>c,\*</sup>

<sup>a</sup> Department of Chemical Engineering, National Taiwan University of Science and Technology, No. 43, Sec. 4, Keelung Road, Taipei 10607, Taiwan

<sup>b</sup> Institute of Applied Science and Technology, Van Lang University, Ho Chi Minh 700000, Vietnam

<sup>c</sup> Department of Chemical Engineering, National Taiwan University, No. 1, Sec. 4, Roosevelt Road, Taipei 10617, Taiwan

<sup>d</sup> Department of Chemistry, College of Science, King Saud University, P.O. Box 2455, Riyadh 11451, Saudi Arabia.

**\*Corresponding Author's E-mails:** whchiang@mail.ntust.edu.tw (W.-H. Chiang),  
[kevinwu@ntu.edu.tw](mailto:kevinwu@ntu.edu.tw) (Kevin C.-W. Wu)

## Experiments

### Determination of detection limit of Ag-PLMOCs to Fe<sup>3+</sup> and Pb<sup>2+</sup>

The calculation method was conducted by following the previous procedure.<sup>1</sup>

Initially, the standard deviation ( $S_b$ ) was calculated following the equation (1)

$$S_b = \sqrt{\frac{\sum_{i=1}^n (x_i - \bar{x})^2}{n-1}} \quad (1)$$

$x_i$  is the emissive intensity of Ag-PLMOCs in water

$\bar{x}$  is the average emissive intensity of Ag-PLMOCs in water for 11 times.

Then, the solution containing a certain amount of Fe<sup>3+</sup> or Pb<sup>2+</sup> and Ag-PLMOCs was measured to record the variation of emission intensity ( $\Delta I$ ). The precision value ( $S$ ) was calculated by the equation (2)

$$S = \frac{\Delta I}{\Delta C} \quad (2)$$

$\Delta C$  is the variation of quencher concentration.

Finally, the limit of detection (LOD) was calculated by equation (3).

$$LOD = \frac{3S_b}{S} \quad (3)$$

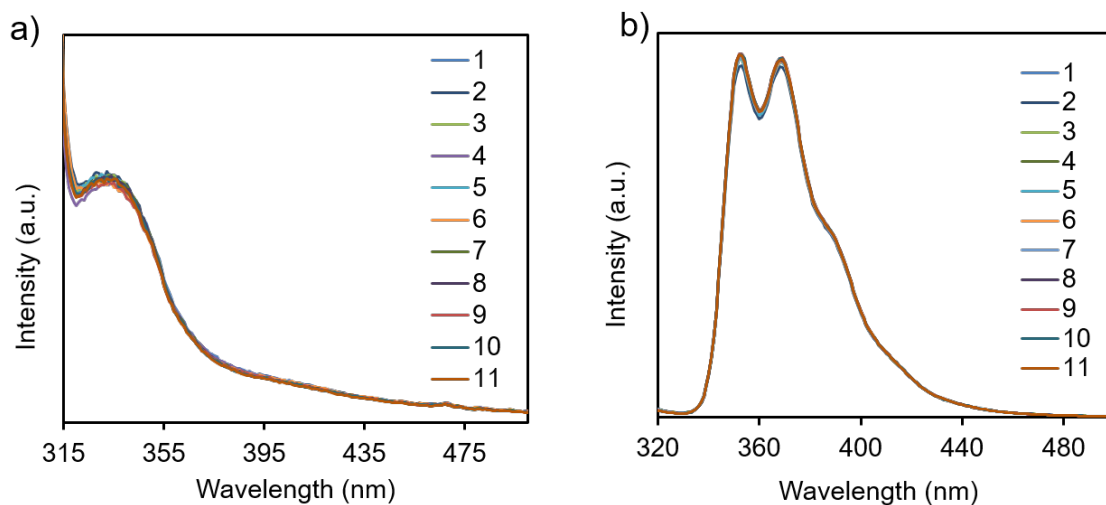

**Fig. S1** PL spectra of a) Ag(bpy)(IPA-OH) and b) Ag(bpy)(2,6-NDC) in water with repetition of 11 times.

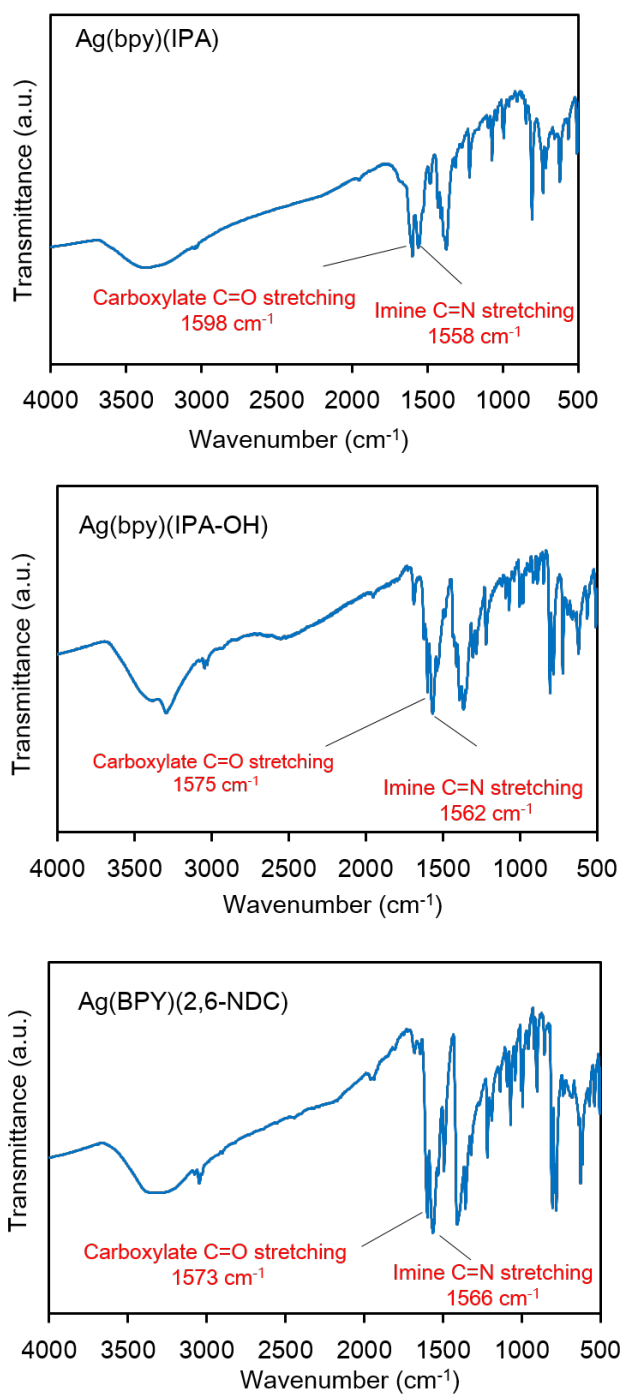

**Fig. S2** FT-IR spectra of as-synthesized Ag-based MOCP demonstrated the presence of imine linkage and carboxylate formation.

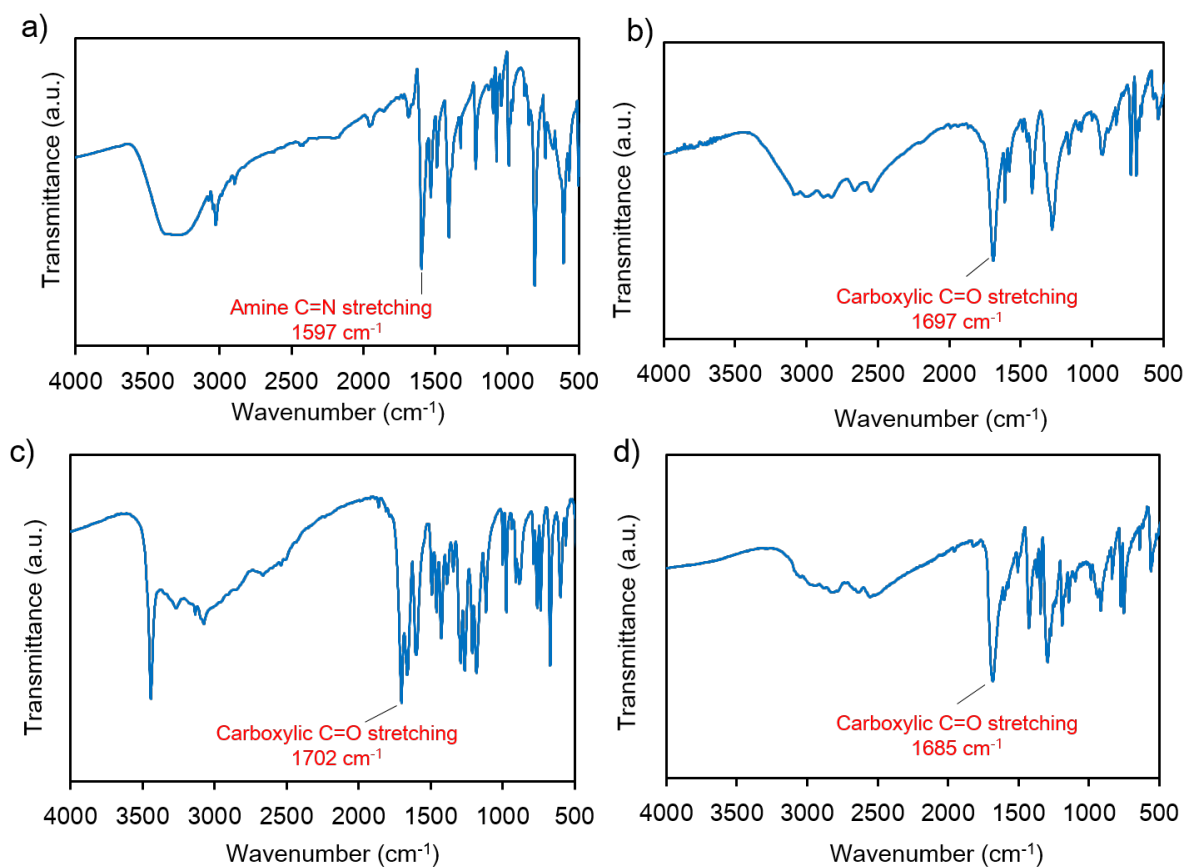

**Fig. S3** FT-IR spectra of a) 4-4'-bipyridine, b) Isophthalic acid (IPA), c) 5-hydroxyisophthalic acid (IPA-OH), and d) 2,6-naphthalenedicarboxylic acid (2,6-NDC) as starting material for comparison.

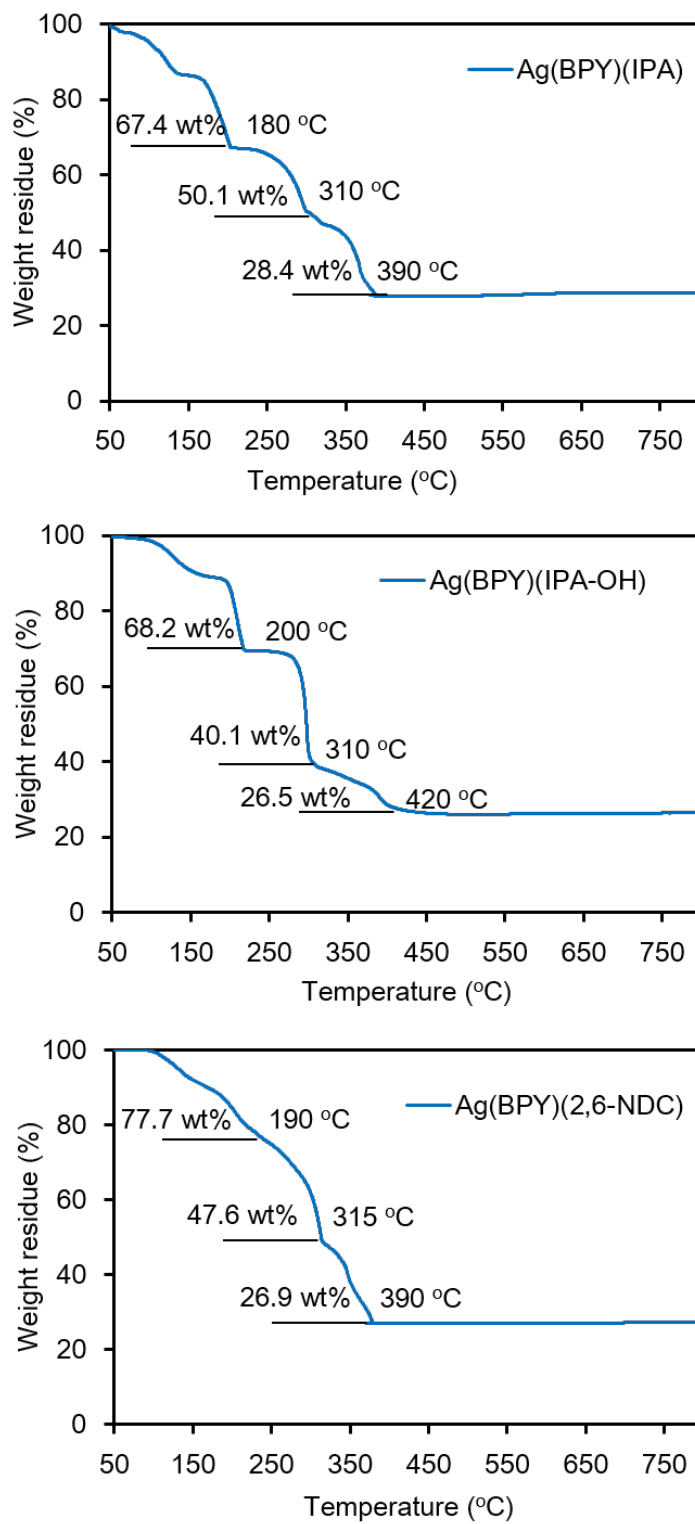

**Fig. S4** TGA results of as-synthesized Ag-based MOCPs demonstrated the thermal stability of these materials.

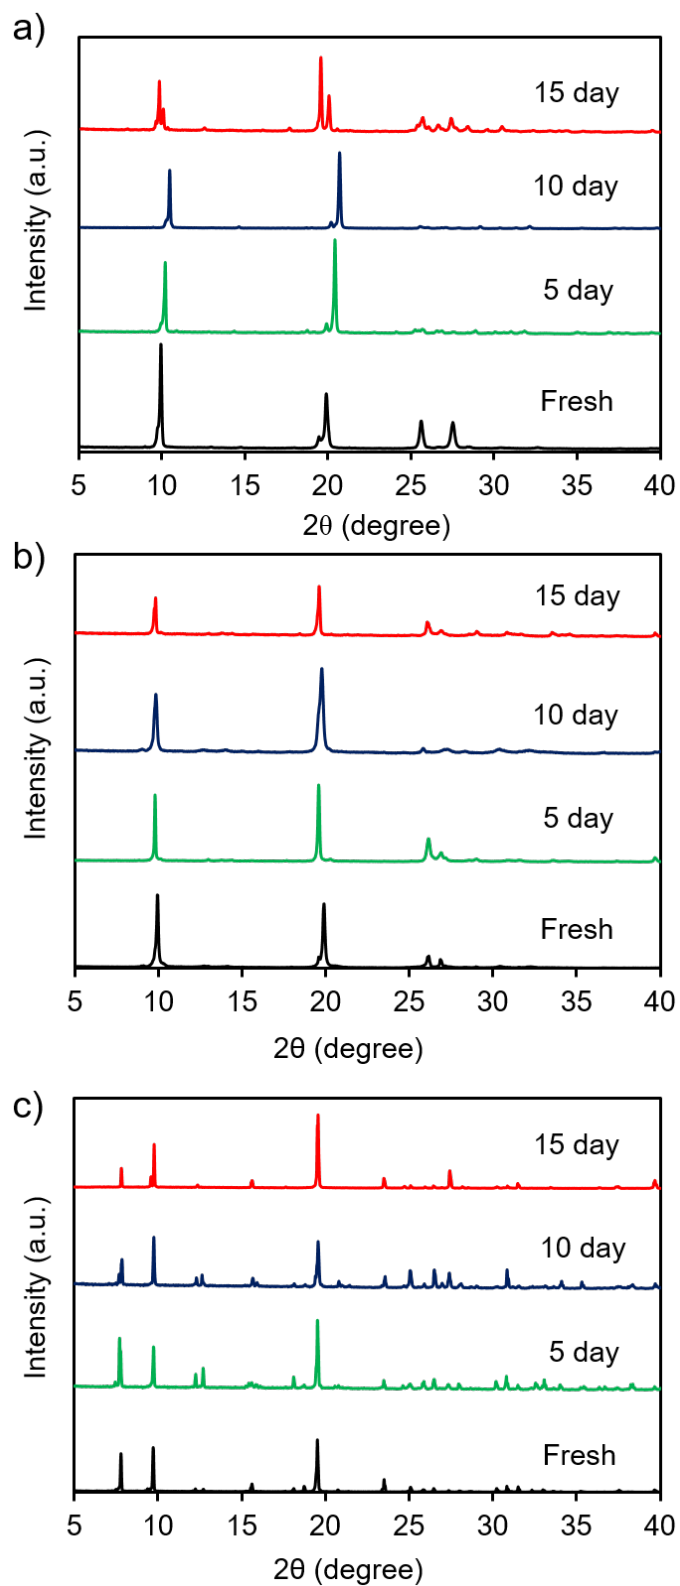

**Fig. S5** Stability of Ag-PLMOCs in water at 50 °C at different times, a) Ag(bpy)(IPA), b) Ag(bpy)(IPA-OH) and c) Ag(bpy)(2,6-NDC).

**Table S1** Excitation and emission of bare linkers and synthesized Ag-based MOC

| Materials           | Excitation (nm) | Emission (nm) |
|---------------------|-----------------|---------------|
| IPA                 | N/A             | N/A           |
| IPA-OH              | 337             | 350           |
| 2,6-NDC             | 383             | 400           |
| IPA-NH <sub>2</sub> | 380             | 445           |

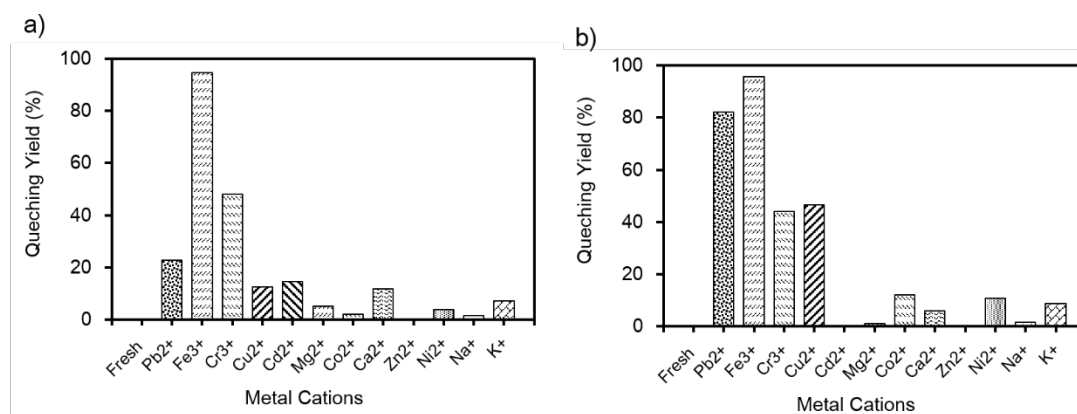

**Fig. S6** PL quenching percentage of metal ions on a) Ag(bpy)(IPA-OH) and b) Ag(bpy)(2,6-NDC) as host material.

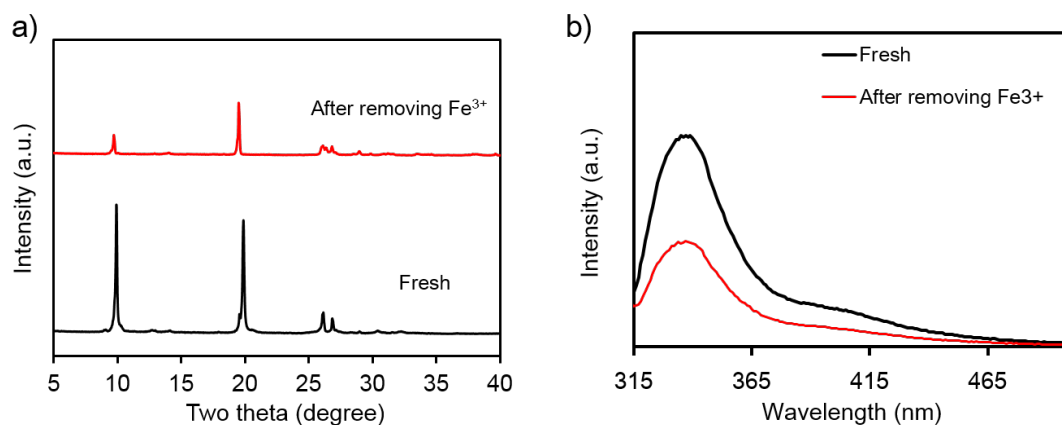

**Fig. S7** a) XRD and b) PL spectra of Ag(bpy)(IPA-OH) before and after immersing in Fe<sup>3+</sup> ion solution.

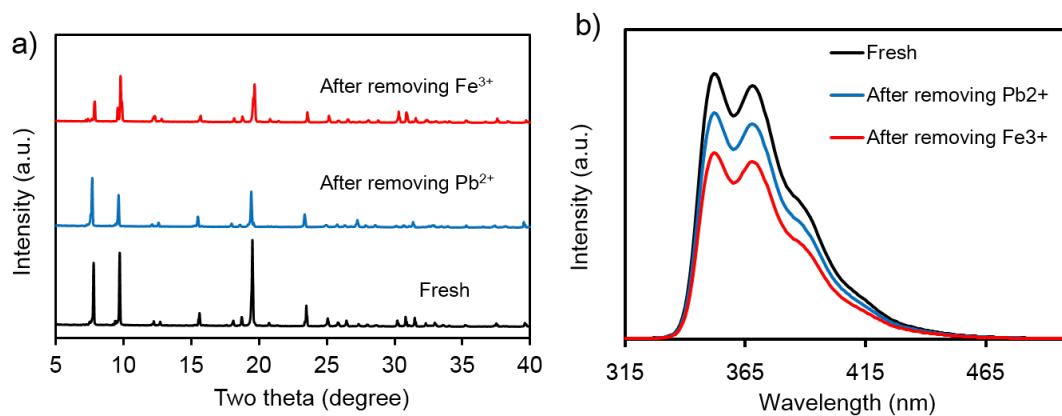

**Fig. S8** a) XRD and b) PL spectra of Ag(bpy)(2,6-NDC) before and after immersing in Fe<sup>3+</sup> or Pb<sup>2+</sup> ion solution.

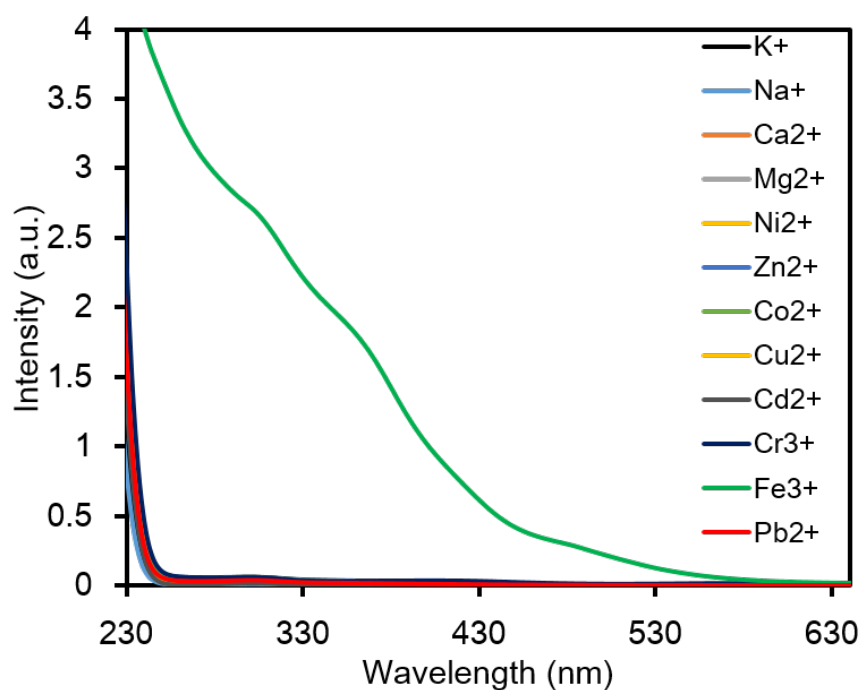

**Fig. S9** UV-Vis spectra of various metal ion solutions.



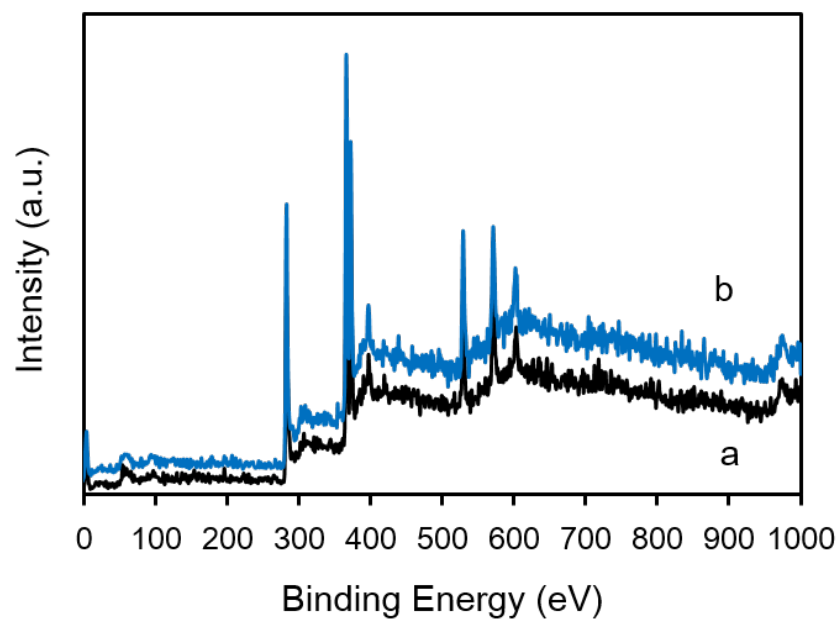

**Fig. S10** XPS spectra of a) fresh Ag(bpy)(2,6-NDC) and b) Ag(bpy)(2,6-NDC) after immersing and removal of Pb<sup>2+</sup>.

**References:**

1. G. He, H. Peng, T. Liu, M. Yang, Y. Zhang and Y. Fang, *J. Mater. Chem.*, 2009, **19**, 7347-7353.
